# Supplementary material for: Technical, economic, and environmental potential of glycerol hydrogenolysis: a roadmap towards sustainable green chemistry future
Source: Royal Society of Chemistry journal article supplement (doi:10.1039/d3se00219e), 2023-01-01
Supplement: d3se00219e1.pdf [file d3se00219e1.pdf]

## Supplementary Information

Technical, economic, and environmental potential for  
glycerol hydrogenolysis: A roadmap towards  
sustainable green chemistry future

Adrian Chun Minh Loy, Wei Lin Ng, Shanthi Priya Samudrala,  
Sankar Bhattacharya\*,

Department of Chemical and Biological Engineering, Monash University, Clayton, 3800,  
Victoria, Australia.

\*Corresponding author

## Appendix 1:

The following is a description of the process flow of the work based on Figure 2:

- 
- a) Step 1: Collecting data based on our experimental work and previous studies, including catalyst preparation, experimental methodology, Aspen Plus configuration, battery limit of the work, and life-cycle function unit.
  - b) Step 2: Developing the process flow diagram for the proposed conceptual design based on the data obtained in Step 1.
  - c) Step 3: Performing techno-economic analysis to examine the economic feasibility of the plant.
  - d) Step 4: Conducting environmental analysis to examine the environmental factors of the plant.
  - e) Step 5: Validating the entire conceptual plant design through collaboration with industrial key partners from Asia and Oceania, such as senior process engineers and energy consultants.
  - f) Step 6: Benchmarking the conceptual plant design with other potential products from glycerol valorization to provide future outlooks for glycerol biorefinery.
-

Table S1. Parameters used for the development of the PSA model

| Parameters                                   | Remarks                      |
|----------------------------------------------|------------------------------|
| Bed materials                                | Zeolite and activated carbon |
| Bed volume ratio (zeolite: activated carbon) | 3:7                          |
| Total length of bed                          | 4.8 m                        |
| Adsorption time                              | 180 s                        |
| Interstitial velocity                        | 0.45 m/s                     |
| Inlet temperature                            | 298 K                        |
| Inlet pressure                               | 6.5 bar                      |

Table S2: Key parameters for the techno-economic assessment.

| Economic parameter                             | Basis                                                                                                                                                                                                                                                                                                                                        |
|------------------------------------------------|----------------------------------------------------------------------------------------------------------------------------------------------------------------------------------------------------------------------------------------------------------------------------------------------------------------------------------------------|
| Cost year for analysis                         | 2021 (CEPCI 708)                                                                                                                                                                                                                                                                                                                             |
| Plant life                                     | 20 years                                                                                                                                                                                                                                                                                                                                     |
| Operating hours (factor)                       | 0.904 (7920 hours per year)                                                                                                                                                                                                                                                                                                                  |
| Plant schedule                                 | One-year design, One-year construction, start production afterwards                                                                                                                                                                                                                                                                          |
| Distribution of permanent investment (capital) | Construction year 50%<br>1 <sup>st</sup> , 2 <sup>nd</sup> production year 25% each                                                                                                                                                                                                                                                          |
| Plant decommissioning cost                     | \$ 0                                                                                                                                                                                                                                                                                                                                         |
| Depreciation rate                              | 12%                                                                                                                                                                                                                                                                                                                                          |
| Sales Tax                                      | 25%                                                                                                                                                                                                                                                                                                                                          |
| Loan rate                                      | 6%                                                                                                                                                                                                                                                                                                                                           |
| Inflation rate                                 | 1%                                                                                                                                                                                                                                                                                                                                           |
| Capital cost (total permanent investment)      | Lang factor: 3.63<br>Land: 3.80 of Total Depreciable Capital<br>Plant start-up: 10% Total Depreciable Capital<br>Site preparation: 5% Total bare module cost<br>Service facilities: 5% Total bare module cost<br>Utility plants and related facilities: \$300,000<br>Contingencies and Contractor fees: 20.0% of Direct Permanent Investment |
| Bare module factors                            | 3.21% purchase equipment cost                                                                                                                                                                                                                                                                                                                |
| Operating cost: Operations                     | Operators per shift: 24 operators with 3 shifts per day<br>Direct wages and benefits: \$40 /operator hour<br>Direct salaries and benefits: 15% Direct wages and benefits                                                                                                                                                                     |
| Operating cost: Maintenance                    | Wages and benefits: 4.5% of Total Depreciable Capital<br>Salaries and benefits: 25.0% of maintenance wages and benefits (MWB)<br>Materials and Services: 100.0% of maintenance wages                                                                                                                                                         |

and benefits

Maintenance Overhead: 5.0% of maintenance wages and benefits

Operating cost: overhead

General plant overhead: 7.10% of maintenance and operations wages and benefits

Mechanical department services: 2.40% of maintenance and operations wages and benefits

Employee Relations Department: 5.90% of maintenance and operations wages and benefits

Business services: 7.40% of maintenance and operations wages and benefits

Operating cost: Property taxes and insurance

2.0% of Total Depreciable Capital

Variable cost

Transfer expenses: 3.0% of Sales

Direct research: 4.8% of Sales

Allocated research: 0.5% of Sales

Administrative expense: 2.0% of Sales

Management Incentive Compensation: 1.3% of Sales

---

Table S3: Equipment cost for the proposed conceptual design.

| Equipment unit                              | Cost (USD) |
|---------------------------------------------|------------|
| Reformer (R1) <sup>a</sup>                  | 800,000    |
| Reformer (R2) <sup>a</sup>                  | 4,800,000  |
| Hydrogenation reactor (R3) <sup>a</sup>     | 5,600,000  |
| Heater (H1)                                 | 22,800     |
| Heater (H2)                                 | 42,200     |
| Heater (H3)                                 | 22,800     |
| Mixer (M1)                                  | 8,300      |
| Mixer (M2)                                  | 7,800      |
| Mixer (M3)                                  | 8,100      |
| Pressure swing adsorption (P1) <sup>b</sup> | 3,300,000  |
| Flash drum (F1)                             | 21,000     |
| Flash drum (F2)                             | 21,000     |
| Compressor (B1)                             | 24,200     |
| Compressor (B2)                             | 28,500     |
| Cooler (C1)                                 | 14,300     |
| Cooler (C2)                                 | 10,500     |
| Distillation column (D1)                    | 1,723,000  |
| Distillation column (D2)                    | 1,723,000  |
| Distillation column (D3)                    | 1,723,000  |
| Total cost                                  | 19,892,000 |

<sup>a</sup>Calculated based on the assumption of downward reformer using the basis of sixth-tenth rule output power, higher heating value, and flowrate of product

<sup>b</sup>Assuming the single bed PSA with length of 4.8m. The cost of PSA also includes

---

installation of vacuum pump

---
